# Supplementary material for: Babesia and Theileria Identification in Adult Ixodid Ticks from Tapada Nature Reserve, Portugal
Source: MDPI journal article supplement (doi:10.3390/pathogens11020222), 2022-02-08
Supplement: s1 [file s1]

**Suppl. Table S2.** Tick species removed from red deer, showing distribution of piroplasm-infected ticks. Infected ticks were PCR positive for either *Theileria* sp. OT3 or *T. capreoli*.

| Red deer | tick                      | n  | <i>Theileria</i><br>sp. OT3 | <i>Theileria</i><br><i>capreoli</i> |
|----------|---------------------------|----|-----------------------------|-------------------------------------|
| 1        | <i>I. ricinus</i>         | 10 | -                           | 1                                   |
| 2        | <i>I. ricinus</i>         | 2  | -                           | -                                   |
|          | <i>R. sanguineus</i> s.l. | 1  | -                           | -                                   |
| 3        | <i>I. ricinus</i>         | 5  | -                           | -                                   |
|          | <i>R. sanguineus</i> s.l. | 2  | -                           | -                                   |
| 4        | <i>I. ricinus</i>         | 1  | -                           | 1                                   |
|          | <i>R. sanguineus</i> s.l. | 4  | -                           | -                                   |
|          | <i>D. marginatus</i>      | 1  | -                           | -                                   |
| 5        | <i>I. ricinus</i>         | 6  | -                           | 3                                   |
| 6        | <i>I. ricinus</i>         | 1  | -                           | -                                   |
|          | <i>R. sanguineus</i> s.l. | 6  | -                           | -                                   |
| 7        | <i>I. ricinus</i>         | 2  | -                           | -                                   |
|          | <i>R. sanguineus</i> s.l. | 1  | 1                           | -                                   |
|          | <i>D. marginatus</i>      | 1  | -                           | -                                   |
| 8        | <i>R. sanguineus</i> s.l. | 6  | -                           | -                                   |
| 9        | <i>I. ricinus</i>         | 2  | -                           | -                                   |
| 10       | <i>R. sanguineus</i> s.l. | 3  | -                           | 1                                   |
| 11       | <i>I. ricinus</i>         | 1  | -                           | -                                   |
| 12       | <i>I. ricinus</i>         | 1  | -                           | -                                   |
