# Supplementary material for: Babesia and Theileria Identification in Adult Ixodid Ticks from Tapada Nature Reserve, Portugal
Source: MDPI journal article supplement (doi:10.3390/pathogens11020222), 2022-02-08
Supplement: s1 [file s1]

Suppl. Table S1. Tick species removed from fallow deer, showing distribution of piroplasm-infected ticks. Infected ticks were PCR positive for one, two or three pathogens.

[illegible]

[illegible]



|    |                           |   |   |   |   |   |   |   |   |   |   |   |
|----|---------------------------|---|---|---|---|---|---|---|---|---|---|---|
| 58 | <i>H. lusitanicum</i>     | 3 | - | - | - | - | - | - | - | - | - | - |
| 59 | <i>I. ricinus</i>         | 7 | - | - | - | - | - | - | - | - | - | - |
|    | <i>H. lusitanicum</i>     | 1 | - | - | - | - | - | - | - | - | - | - |
|    | <i>D. marginatus</i>      | 2 | - | - | - | - | - | - | - | - | - | - |
| 60 | <i>I. ricinus</i>         | 1 | - | - | - | - | - | - | - | - | - | - |
|    | <i>D. marginatus</i>      | 1 | - | - | - | - | - | - | - | - | - | - |
| 61 | <i>I. ricinus</i>         | 3 | - | 1 | - | - | - | - | 1 | - | - | - |
|    | <i>R. sanguineus</i> s.l. | 1 | - | - | - | - | - | - | - | - | - | - |
| 62 | <i>R. sanguineus</i> s.l. | 1 | - | - | - | - | - | - | - | - | - | - |
| 63 | <i>I. ricinus</i>         | 1 | - | - | - | - | - | - | - | - | - | - |
|    | <i>H. punctata</i>        | 1 | - | - | - | - | - | - | - | - | - | - |
| 65 | <i>I. ricinus</i>         | 1 | - | - | - | - | - | - | - | - | - | - |
| 66 | <i>I. ricinus</i>         | 1 | - | - | - | - | - | - | - | - | - | - |
| 67 | <i>D. marginatus</i>      | 1 | - | - | - | - | - | - | - | - | - | - |
| 68 | <i>I. ricinus</i>         | 1 | - | - | - | - | - | - | - | - | - | - |
| 69 | <i>I. ricinus</i>         | 1 | - | - | - | - | - | - | - | - | - | - |
| 70 | <i>I. ricinus</i>         | 1 | - | - | - | 1 | - | - | - | - | - | - |
| 71 | <i>I. ricinus</i>         | 1 | - | - | - | 1 | - | - | - | - | - | - |
