# Supplementary material for: Babesia and Theileria Identification in Adult Ixodid Ticks from Tapada Nature Reserve, Portugal
Source: MDPI journal article supplement (doi:10.3390/pathogens11020222), 2022-02-08
Supplement: s1 [file s1]

```

B. microti 157 bp GTTATAGTTTATTTGATGTTTCGTTTTACATGGATAACCGTGGTAATTCTAGGGCTAATAC
B. microti 155 bp GTTATAGTTTATTTGATGTTTCGTTTTACATGGATAACCGTGGTAATTCTAGGGCTAATAC
*****

B. microti 157 bp ATGCTCGAGGCGCGTTTTACGCGTGGCGTTTATTAGACTTTAACCAGCCCCTTTGGGTAA
B. microti 155 bp ATGCTCGAGGCGCGTTTT-CGCGTGGCGTTTATTAGACTTTAACCAA-CCCTTCGGGTAA
*****

B. microti 157 bp TCGGTGATTCATAATAAATTAGCGAATCGCATGGCTT
B. microti 155 bp TCGGTGATTCATAATAAATTAGCGAATCGCATGGCTT
*****

```

Figure S1: *Babesia microti* detection by PCR and DNA sequencing.
